# Supplementary material for: Reconciling ice dynamics and bed topography with a versatile and fast ice thickness inversion
Source: Copernicus journal article supplement (doi:10.5194/tc-2023-43), 2023-04-04
Supplement: Supplementary file [file tc-2023-43-AC2-supplement.pdf]

# Reconciling ice dynamics and bed topography with a versatile and fast ice thickness inversion - response to reviewer 2

Thomas Frank, Ward van Pelt, Jack Kohler

June 2023

## 1 Response to reviewer 2

We are grateful to the reviewer for his/her remarks that helped us to improve our manuscript. We reply below by highlighting the reviewer's comments in italics above our answers.

### 1.1 Summary

*In this manuscript, the authors present an iterative approach to simultaneously infer the poorly constrained basal topography beneath glaciers as well as to initialise a glacier system model into a self-consistent state for prognostic simulations. Input requirements are surface observations on ice geometry and ice velocity as well as surface mass balance estimates (SMB). Thickness measurements are not ingested but withheld for validation. The approach is applied to a synthetic ice-cap setup and to a real-world glacier, i.e. Kronebreen on Svalbard. The synthetic setup serves to present a performance baseline for non-slip and sliding regimes under idealised input conditions. It is also exploited to analyse the sensitivity to input uncertainties and a-priori parameter choices. The method is then put to the test on Kronebreen, for which further methodological refinements - also during post-processing - are introduced. The performance of the iterative optimisation approach convinces for the synthetic setup, as the bed is retrieved with high accuracy. In the real-world, the misfit remains elevated as input fields and model parameters are less well known. Nonetheless misfit metrics are comparable to other approaches when observations are not ingested.*

*When I accepted the review, I was mostly attracted by the fact that this approach allows for a simultaneous initialisation of a forward model. Although this remains a side aspect in the manuscript, I consider this initialisation a big asset of the approach presented in this manuscript. I want to congratulate the authors to their concise presentation of this initialisation strategy. During my review, I however identified some major concerns on methodological details and the experimental design. The manuscript is well written and easy to follow, yet the structure can be improved. Moreover, there is a clear need for extending the discussion, certainly with regard to an assessment of the performance. In summary, I am very positive about this manuscript and I recommend that the editor should continue to consider it for publication in *The Cryosphere* after my concerns have been alleviated. This will certainly imply a major revision.*

We thank the reviewer for the overall positive attitude towards our manuscript.

## 1.2 Major comments

### ***Benchmark Glacier***

*I think you should extend your setup to one of the ITMIX2 benchmark glacier, preferably a valley glacier. ITMIX2 is the reference benchmark for such approaches. As glacier, I suggest Austre Grønfyjordsbreen as it is also on Svalbard and as most input is available. I ask for this because you deliberately forward regional-scale applicability on which such valley-glacier setups are regularly encountered. Moreover, sliding is less important and might be a challenge for the hybrid SIA-SSA model variant of PISM that uses an empirical function to combine sliding and creep. For a valley-glacier setting, I wonder how your initial viscosity choice will affect your performance even when allowing for sliding updates. Moreover, an ITMIX setup would provide possibilities to directly compare to the performance of other reconstruction approaches.*

We chose Kronebreen as a test case due to its exceptional coverage with ice thickness observations which is even better than for the ITMIX glaciers. Nevertheless, a comparison with one of the ITMIX glaciers is a reasonable suggestion which we also considered including in our original manuscript. However, there are reasons that speak against that: First, describing another setup will inflate the length of the manuscript considerably and lead to an overall confusing structure of the paper. Second, running the hybrid SIA-SSA model on a valley glacier, as suggested, is indeed challenging. In fact, using PISM for such a setup would stretch the model’s capabilities and possibly lead to poor results. A model more suited for valley glaciers (i.e. a higher-order or Full Stokes model) would hence need to be used as a forward model, but again, describing this model in the manuscript would inflate the length and divert the focus away from the key points of the paper. We, therefore, suggest to refrain from adding another test glacier. However, we are currently preparing another manuscript where we use the fast Full-Stokes emulated ice-flow model IGM (Jouvet, 2022) to apply our method on a regional scale, thus attesting to the large-scale applicability of our method. We will add an outlook in the discussion section on that. Furthermore, to accommodate the reviewer’s comment on comparability of our method with other inversion techniques, we will more explicitly discuss how the results of Kronebreen compare to other thickness products available for that glacier.

### ***Thickness observations***

*I truly appreciate that you compare your Kronebreen results to thickness observations. Yet I wondered why you did not use them during the iterative optimisation to better constrain your bedrock result. As you do know the bed in some locations, you could simply apply a ‘restoring’ in your bedrock update (Eq. 1) that drags the bed in each iteration towards these observations. In this way, you could further reduce the final bed misfit that currently exceeds 100m in the Kronebreen setup (Fig. 4a). I also want to emphasise that reconstruction models in the 2nd round of ITMIX were asked to ingest thickness measurements. Moreover, ITMIX2 did highlight the importance of direct measurements and gave suggestions on acquisition strategies. Therefore, your approach would highly benefit from the capability of assimilating thickness measurements.*

We appreciate the suggestion from the reviewer. So far, we did not include any thickness observations in our bed inversion since we regard it as a strength of our method that it does not require any observations. Considering the lack of bed observations for most of the glaciers world-wide, this is a great advantage which will be handy when applying the method on a large scale. Nevertheless, we agree with the reviewer that it is interesting to test how good the method would work when thickness observations are available. We therefore ran simulations where we used different percentages (30%, 50% and 80%) of the bed observations and kept the bed height fixed there. However, this did not improve our results further. We think that this because our method places great weight on internal model consistency meaning that the method can only yield a result that is consistent between the

boundary conditions and the model physics. When artificially fixing the bed height at a location, an inconsistency is created which the model cannot take advantage of. Instead of prescribing bed heights, we therefore suggest to tune certain parameters (e.g. ice viscosity) to assimilate ice thickness observations. We will reflect this point in the discussion of the revised manuscript.

### ***On iterations and alternations***

*If I understand your alternating optimisation strategy well, the basal and surface topographies are iteratively adjusted during prescribed 1000 steps followed by a single friction update. I wonder why the frictions coefficient is not updated iteratively as well. Friction seems decisive. Did you try this? I wonder if this could speed-up the convergence. As it stands now the convergence will very much depend on the actual value for  $\lambda$ . I further wonder about the stopping criterion, which is set as a fixed number of iterations (which is not mentioned in the methods but during the experimental description - please adjust). In this way, much computing time is spent in negligible bed updates. An objective criterion on effective basal topography changes per iteration could help to further speed-up the optimisation. In addition, it would imply actual convergence.*

To clarify: we conduct in total several thousand iterations per experiment, so friction is updated several times, unlike what the above comment seems to indicate (“*I wonder why the frictions coefficient is not updated iteratively as well.*”). If the reviewer is asking whether we could update friction field and bed topography simultaneously in each iteration, we have done such experiments. However, we find that doing so the method does not converge. As stated in the manuscript (L139-142): “Importantly, bed and friction are not updated in the same iteration. This is because the  $dh/dt$  misfit and the velocity misfit both represent a mismatch in modelled vs. observed flow dynamics and it is not clear how to disentangle which part of that mismatch is due to an erroneous friction field vs. an erroneous bed.” In the revised manuscript, we will add that this statement is based on experiments we conducted.

Furthermore, if the reviewer is asking whether the friction field could be updated more frequently than the bed: Friction updates have a near-instantaneous effect on ice velocity and therefore ice thickness, leading to a rapid convergence to a new state after a friction update. And although the effect of a friction update applied at one grid point is non-local due to the mathematical nature of the SSA, the radius of affected cells around is limited, again indicating that a new state is reached rapidly after a friction update. Bed updates, on the contrary, lead to changes in the mass ‘export’ of an affected cell, and thus affect all downstream grid cells which will also change their mass ‘export’. Because of that, bed updates are travelling downstream through the entire glacier, implying that it takes much longer to reach a new state after bed updates. In fact, through this concept, it can be understood that the convergence time to a new bed is equivalent to the response time of the glacier to a mass balance perturbation. So, given the difference in convergence time of bed vs. friction updates, it does not make sense to swap the order between them. We did conduct experiments that show just that, but for the sake of conciseness suggest that a discussion as done here will suffice in the revised manuscript.

Regarding the comment on a stopping criterion, the revised manuscript will include a remark stating that a stopping criterion could easily be set based on, e.g.  $\Delta dh$ , by triggering a new friction update when  $\Delta dh$  is smaller than a pre-defined value. For the sake of simplicity of this first application of the method, we do not explore this possibility further in our manuscript.

### ***Sensitivity analysis***

*I deeply appreciate the sensitivity analysis for your synthetic ice-cap setup in the appendix. To me the most unconstrained parameters/variables are the climatic mass balance (CMB) and the ice viscosity. As I understand it, the synthetic geometry is in equilibrium, which means that the specific CMB should be zero. In Figure A1, you present relative CMB values with regard to a reference, which I suspect*

should be zero in a specific sense. So how can this value be increased by 25-75%. This is certainly a misperception from my part (I might sense that you actually increase the point values by these relative values – which would imply that the specific values remains unchanged; in reality we do not know the specific CMB). In any case please explain and think about rather providing absolute specific perturbation values in metres ice equivalent per year. Concerning ice viscosity, I think your analysis is convincing, certainly as you also present results without friction update (Fig. A4). Finally the sensitivity test with regard to the time step  $dt$  of the forward model seems dispensable. In my view, no matter the choice, equation (1) should internally compensate the time step scaling. The only constraint is that the mass conservation implementation remains numerically stable.

As correctly inferred by the reviewer, we modified the point values of CMB rather than uniformly adding or subtracting mass at all points in the domain. Although, as the reviewer rightfully points out, we do not know specific CMB usually, we can, prior to an inversion, ensure that the mass balance  $\int_{\Omega} CMB d\Omega = \int_{\Omega} \frac{dh}{dt} d\Omega$  over a glacier is closed. While this admittedly may be harder for marine-terminating glaciers (although large-scale calving flux estimates exist (Kochtitzky et al., 2022)), it is straight-forward for land-terminating glaciers such as our ice-cap example. Because of that, it would not have made sense to perturb CMB with an absolute value. We will clarify our experimental setup for the mass balance perturbations in the revised manuscript.

On the comment of testing  $dt$ , we do think that there is a point in conducting a sensitivity experiment. Specifically, by calculating  $\frac{dh_{mod}}{dt}$  from the ice thickness at the start of the forward simulation minus the ice thickness at the end of the forward simulation, we assume that the change between these two points in time is linear. However, this is not necessarily the case because  $\frac{dh_{mod}}{dt}$  reduces as the glacier relaxes towards a new steady-state. By choosing a small  $dt$ , we may, therefore, always sample the steep part of the glacier relaxation curve, while choosing a large  $dt$  could also include points in time when the glacier is already fully relaxed. The fact that we do not find any such effects suggests that this is indeed not a significant problem, but this is not directly obvious.

### **Manuscript structure**

*In my view, you should better distinguish between methods, results and discussion. I somehow like your division by synthetic and real-world setup in terms of experimental setup and results. Yet the methodological updates in the latter setup, concerning the control parameter update (on  $\beta$ ) and the post-processing, are confusing. I would introduce both concepts already in the methods section and apply them consistently both in the synthetic and real-world setup. Please streamline both setups in terms of methods. The manuscript would be easier to follow. Moreover, the last section on ‘Discussion & Conclusions’ is confusing. Please separate both aspects into dedicated sections.*

We thank the reviewer for suggestions on streamlining the manuscript. Following the comment, we will completely restructure the methods section and add a new subsection ‘Stabilization techniques’ where we introduce several tools used later in the experiments which aid convergence, among others the ‘ramp-up’ for  $\beta$ . Doing so, we hope to accommodate the reviewers request to better separate between methods and results. In fact, since submission of the initial manuscript, we have discovered a new stabilization method which improves the results for the synthetic ice cap. Corresponding changes in the ice cap section and the appendix are therefore made, which, however, do not change any general conclusions of the paper. For Kronebreen, the results remain unchanged. We will also restructure the discussion section to improve readability.

Regarding the post-processing step, we do not consider it part of the core design of our new method, but rather an addition which generally should not be needed with our method. If using our method for spin-up, for instance, the post-processing as done in this manuscript would not be advisable. Because of that we suggest to keep that chapter at its current place.

We will add a separate conclusions section.

### ***Discussion***

*As it stands, your discussion focusses on the benefits of the sliding updates, limitations from regularisation and the post-processing. I miss some comparison of how your approach performs with respect to others. You forward the mean absolute error as a measure of performance - is this quantity available for other approaches. To my knowledge the global consensus estimate by Farinotti et al. (2019) can be exploited for a direct comparison to your Kronebreen results*

As mentioned in response to a previous comment, we will include a more detailed discussion on that in the revised manuscript. Specifically, we will present the mean absolute error for three other available ice thickness products and discuss them in relation to our results.

## **1.3 Minor comments**

**L1-4** *I totally understand your intrinsic excitement/motivation to raise global scale applicability in the first sentence. Yet in L4 your phrasing already moderates this applicability to local and large scales. As this study presents a new method, the abstract should rather focus on performance not so much on the outlook. This outlook is indeed exciting and should/could be an aspect for your conclusion section.*

We agree with the reviewer that the original abstract may have been focused too much on the outlook and will rephrase.

**L6-7** *Here you claim that your iterative approach also serves for model initialisation into a self-consistent state. Your experimental setup does not substantiate this claim. It is taken as a fact from the methodological design. It could be worth to run the synthetic ice-cap setup forward in time after bed retrieval. Ideally the geometry would not change much in this equilibrium setup.*

This is a good point by the reviewer. To substantiate our claim of a self-consistent model state after the bed and friction inversion, we have conducted an experiment where we run the ice cap forward for 100 yrs after the inversion. The ice volume change over that period is 0.18%, suggesting that the ice cap is in a steady-state. A remark on that will be added in the revised manuscript.

**L92** *You formulate that the observed elevation change is the primary target quantity for optimisation. I am a bit worried on the model capabilities to reproduce these rates near the glacier margin (no matter if land- or marine- terminating). It is known that this regions is critical in terms of flux divergence. In your synthetic ice-cap setup, you deliberately exclude the margin from the bed retrieval (L183). For the real-world glacier you even introduce strong gradients by the applied masking. Together with the SIA aspect in the ice-dynamic formulation, I wonder about any consequences for the applicability. This is certainly another point that should be picked up in the discussion.*

Unfortunately, we are not entirely sure what the reviewer refers to exactly. Indeed, ice margins can be difficult to model, hence why interpolation there may be in order (which we will describe in the newly create section 'Stabilization techniques'). However, we do not see how the masking in the Kronebreen example introduces strong gradients (see below), and we also do not generally observe issues at the ice margins.

**L151** *As your iterative approach infers the bedrock topography and the friction coefficient simultaneously, you should discuss potential ambiguities. Is this problem well posed? Is there only a single*

*solution and are you convinced that the target parameters can be well differentiated.*

The question of whether there are unique solutions is indeed an interesting one that has not been discussed enough in our initial submission. Recall that the concept of the apparent mass balance shows that  $dh/dt$  and mass balance together determine the total mass which is fluxed through a glacier. This mass may be transported either by a thick but slow glacier, or a thin but fast glacier. By forcing our model to reproduce observed velocities via the friction coefficient there would only be one ice thickness that matches the mass flux if ice thickness and ice speed were independent of each other. However, since ice thickness also influences ice speed by changing the driving stress, there is a small realm of overlap between two regimes, namely when observed velocities can be reproduced either by a change in ice thickness or in basal friction. Due to the different characteristics of sliding (non-local, vertically uniform velocity profile) and shearing (local, vertically dependent velocity profile) ice physics, we think that it is typically very unlikely that changing thickness or basal friction would lead to the same ice velocity and mass flux, and therefore, that non-unique solutions are common. Given the fact that all of our experiments, synthetic and real-world ones, converge to a sensible bed even with different initial conditions corroborates this idea. We will include this discussion in the revised manuscript.

**L183-184** *Do you also apply this margin masking for the real-world setup.*

No, we will clarify that in the revised manuscript.

**L267** *This initial Gaussian filtering seems vital for application of the SIA. Still for more complex valley-glacier geometries, this step might not remove all artefacts. I therefore wonder if you also tried an initial relaxation with a prognostic run for which the geometry is not allowed to evolve too much (by capping the elevation change rates). This strategy could be more robust and beneficial as a prior step to your reconstruction.*

It is unclear to us how this should work, since any prognostic run requires bed elevation as input, and hence any glacier surface shape resulting from the forward simulation would be directly dependent on the assumed bed shape. A bed inversion starting from a surface shape derived in that manner would likely yield a bed very similar to the one used in the initial relaxation.

**L282** *The masking of ice cover to the Kronebreen outline seems a bit harsh as it will introduce extreme gradients in surface elevation for example at the divide with Kongsbreen. I suggest to rather keep the full ice geometry also outside the Kronebreen outline and only update the basal topography within the mask (and prescribe/freeze it outside). It should not be difficult. Probably this is anyway what you have done.*

If we understand correctly what the reviewer refers to here, it may indeed be that we did as the reviewer suggested. To clarify, there are no strong gradients in surface elevation at the margin of Kronebreen since the surface height in the immediate vicinity of our mask is given by the same DEM used inside the mask. When we state that outside the mask, ice thickness is forced to zero, it means that the bed elevation there corresponds to the surface elevation. If what the reviewer suggests is to prescribe a fixed non-zero ice thickness outside the mask, we do not think that this is meaningful as it would require us to make an assumption on the surrounding ice thickness which is unknown. As stated in the manuscript (L.286), with our setup some remaining boundary effects still cannot be ruled out, but we have no reason to suspect any major irregularities.

**L295-303** *Many details on parameter choices of this paragraph can be added to Table 1. See below*

comment on Table 1. In this way, I sense that this paragraph can be reduced.

We agree and will extend Table 1 accordingly.

**L317** *The iterative increase of this relaxation parameter seems very fundamental in terms of methodology. I therefore urge you to include it in the main method also covering the synthetic setup.*

While being beneficial to the approach in that it aids convergence, iteratively increasing  $\beta$  is not vital for the method and does not improve the results for the synthetic ice cap. But following the suggestions on restructuring the manuscript, we added a paragraph on this in the new section ‘Stabilization techniques’.

**L342-343** *In my view membrane stresses are in general captured by the hybrid SIA-SSA ice-dynamic variant in PISM. It might be that the PISM strategy to merge SIA and SSA anyway suppresses this effect. Please be more specific and rephrase.*

In paragraph 43, Bueller and Brown (2009) state that “[in] the nonsliding case, none of the driving stress is held by the membrane strain rates. In the latter [nonsliding] case the SSA predicts no flow so we propose that the SIA should “take over” and predict flow by shear in vertical planes.” In our understanding of the SIA-SSA hybrid, the SIA alone controls ice flow in the absence of basal sliding. This is explicitly stated in our manuscript L.295-296.

**L348-365** *Here you introduce a post-processing correction in the middle of your results section. This comes as a surprise to the reader. I suggest that you rather introduce it as an optional post-processing filter in the methods. I am sure that, there, it can be presented more concisely.*

As discussed above, we do think that the post-processing step better fits here as it is not at the heart of our new inversion methodology. However, we will integrate this paragraph better in the surrounding text in the revised manuscript so that it hopefully does not come as a surprise to the reader anymore.

**L366-376** *This entire paragraph has a discussion character and does not fit into the results section. Please adjust according to my main comment on the manuscript structure.*

In the revised manuscript, the discussion section covers many aspects generally related to our inversion method (much more extensively than in the original manuscript, thanks to the reviewer’s comments) which, after all, is the novelty of our paper, while Kronebreen is only a test case. Discussing the mass balance sensitivity of Kronebreen would therefore not fit with the general focus of that section. So instead, we will pack this paragraph into a new sub-section of the Kronebreen results which we hope also contributes to an overall clearer structure of the manuscript.

**L372** *‘too high’ -> ‘too low*

Thanks for pointing that out!

## 1.4 Figures and Tables

*Generally, the figure quality can be improved to better guide the reader to the important details by structural and visual re-formatting.*

**Fig.2** I think this figure tries to serve two purposes. First it presents a schematic of the iterative approach. Second it introduces the synthetic ice-cap setup. I would split these two aspects in two individual figures. The introduction of the synthetic ice cap is the second figure and it should be formatted similarly to the present Fig. 3 (see respective comments). I would also not blend input fields and results in one figure. I therefore better like your presentation of the real-world setup in Fig. 3 and Fig. 4. Please try to present the synthetic setup analogically. For the results of the iterative figure (currently Fig. 2b), I urge you to also show iterative reduction of the mismatch between observed and modelled velocities and ice thickness. This is more easily done once you present the results as an individual figure. The velocity mismatch should decrease during the friction updates. I wonder what happens during the subsequent 1000 iterations of bed updates.

We follow the reviewer's suggestions and re-structure the content of Fig. 2. Specifically, we will add a schematic representation of the iterative approach to Fig. 1, and divide the inputs and results of the ice cap experiment in two separate figures. In that second figure, we will also plot the velocity mismatch. However, the thickness mismatch is exactly the same as the bed mismatch, so we do not think that it is necessary to show that.

**Fig.3** I miss the thickness observations in this figure. Please add another panel.

Will do.

**Fig.4** Please add the requests on Fig. 2. Furthermore, can you rather show relative thickness errors instead of absolute bed errors in panel c. This will facilitate the assessment of the importance of these differences. In addition, I request that you do not focus on this central location for the velocity comparison but rather show an extra figure covering the entire Kronebreen catchment showing modelled and observed velocities. Then the reader can better assess your velocity results, which are otherwise not presented. The latter could be an extra figure.

As above, we will also show the velocity misfit per iteration.

Showing relative thickness errors instead of absolute ones is problematic since it significantly inflates errors where the true ice thickness is small. A model that produces an ice thickness of 10 m when the true ice thickness is 20 m is quite good, but will appear very bad if a relative comparison is made. To adequately judge the capabilities of an inversion and allow the reader to identify where the results are good and bad, we therefore find it much more informative to show absolute bed errors.

On adding a figure with observed and modelled velocities, we would like to point out that the velocity results are already shown in the present figure, namely in panel b) where a comparison between modelled and observed velocities is made. In the interest of conciseness, we therefore do not think that it is necessary to add another figure.

**Fig.5** What do the colours mean in panel c? To me it would make sense to have panel c also presented for the synthetic ice cap. This could serve as a baseline for an ideal setup and help to assess your approach.

The colors show represent point density to indicate where the majority of observations is found. Panel c will also be added for the synthetic ice cap.



*Table 1 Please extend this table to cover all experimental setups (ice cap, Kronebreen and potentially Austre Grøn fjordsbreen). In this way, comparison is facilitated (also see comment to L295-302).*

Will do.

## References

- Bueler E, Brown J. 2009. Shallow shelf approximation as a “sliding law” in a thermomechanically coupled ice sheet model. *Journal of Geophysical Research: Earth Surface* 114. doi:10.1029/2008JF001179.
- Jouvet G. 2022. Inversion of a Stokes glacier flow model emulated by deep learning. *Journal of Glaciology* :1–14doi:10.1017/jog.2022.41.
- Kochtitzky W, Copland L, Van Wychen W, Hugonnet R, Hock R, Dowdeswell JA, Benham T, Strozzi T, Glazovsky A, Lavrentiev I, Rounce DR, Millan R, Cook A, Dalton A, Jiskoot H, Cooley J, Jania J, Navarro F. 2022. The unquantified mass loss of Northern Hemisphere marine-terminating glaciers from 2000–2020. *Nature Communications* 13:5835. doi:10.1038/s41467-022-33231-x.
